# Supplementary material
Source: PubMed Central journal article supplement (PMC2872998)
Supplement: NIHMS197855-supplement-1_si_001.pdf [file NIHMS197855-supplement-1_si_001.pdf]

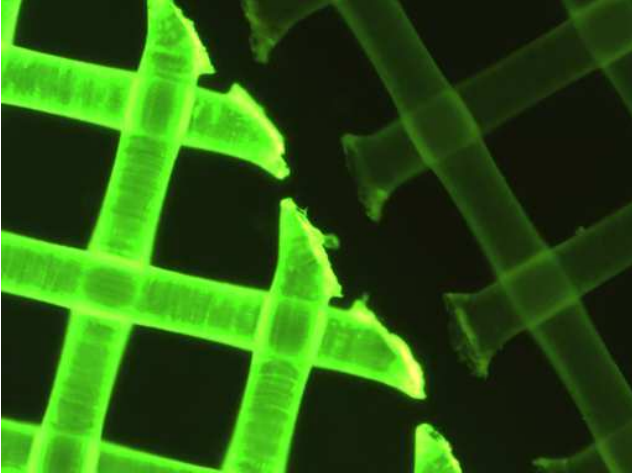

**Supporting Information Figure S1.** Fluorescent micrograph comparing neutravidin (FITC) derivatized and underivatized polyamide mesh materials. Neutravidin is coupled uniformly across the mesh surface

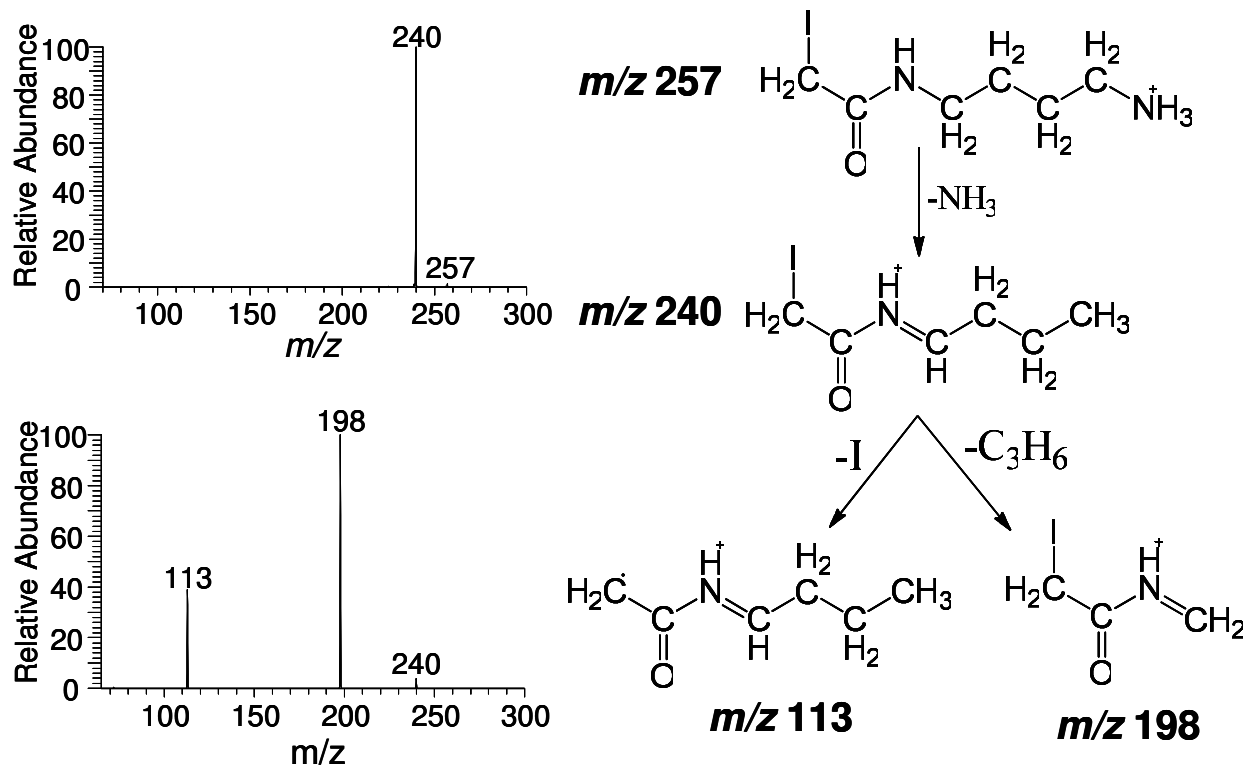

**Supporting Information Figure S2.** Tandem mass spectra and fragmentation pathways for iodoacetamidyl-butylamine (IABA), the reporter ion for photocleaved VICAT<sub>SH</sub>. Upon CID the precursor ion of  $m/z$  257 undergoes the loss of ammonia to form the product ion of  $m/z$  240. After isolation and further CID, this product ion produces the  $MS^3$  product ions of  $m/z$  198 and  $m/z$  113.

# Mercaptopurine

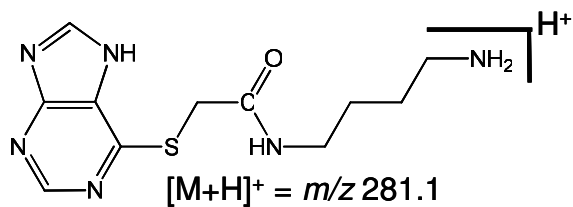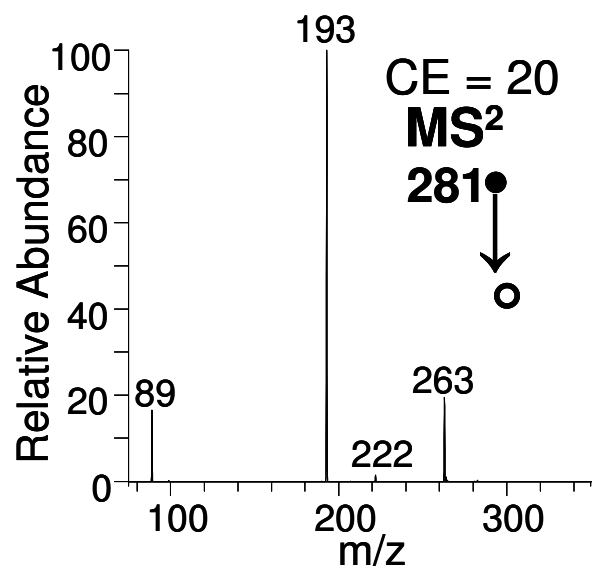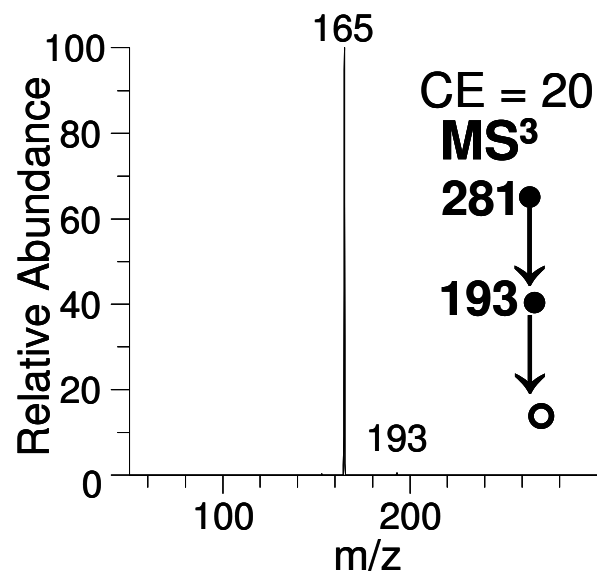

Supporting Information Figure S3. Tandem mass spectra for mercaptopurine captured by VICAT<sub>SH</sub>.

# Captopril

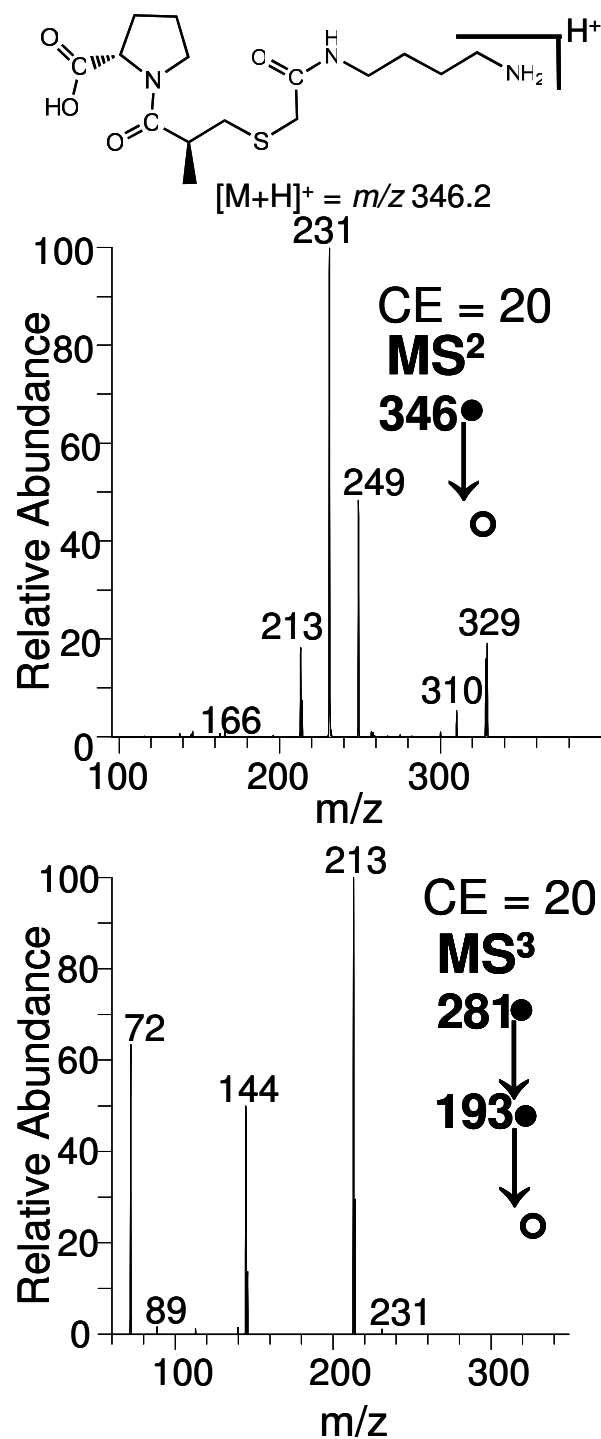

Supporting Information Figure S4. Tandem mass spectra for captopril captured by VICAT<sub>SH</sub>.

# Penicillamine

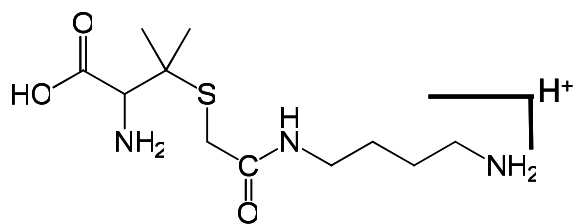

$$[M+H]^+ = m/z 278.2$$

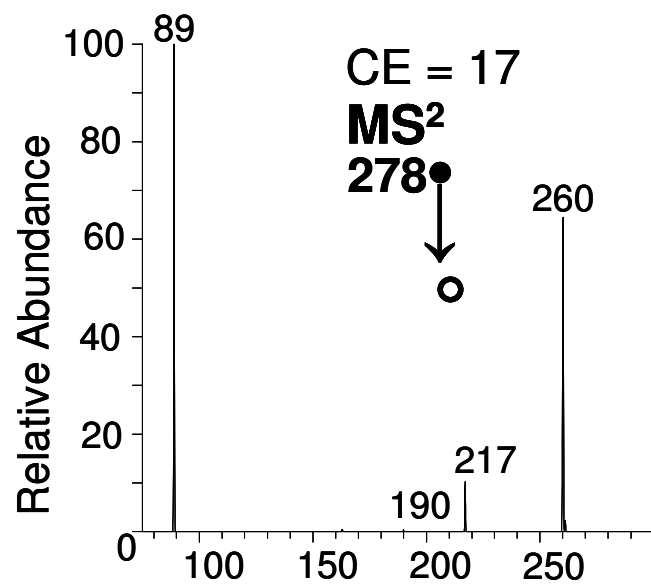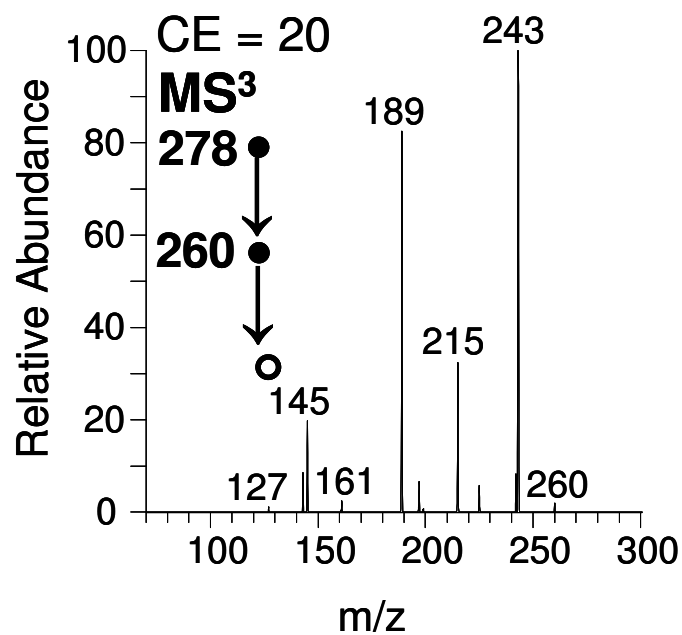

Supporting Information Figure S5. Tandem mass spectra for penicillamine captured by VICAT<sub>SH</sub>.

# Acetylcysteine

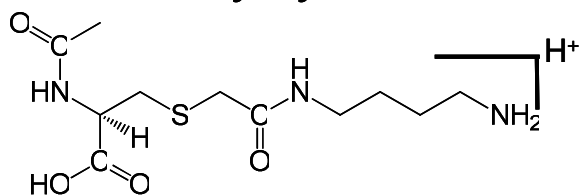

$[M+H]^+ = m/z 292.2$

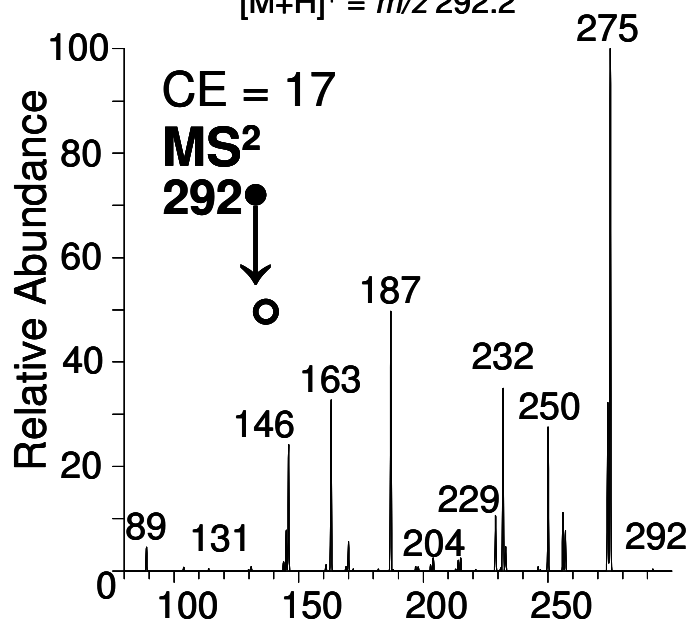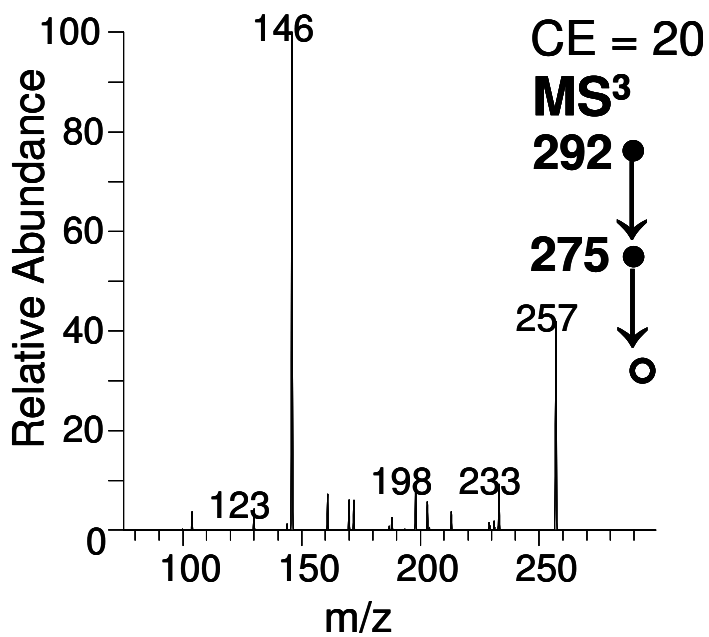

Supporting Information Figure S6. Tandem mass spectra for acetylcysteine captured by VICAT<sub>SH</sub>.

# Cysteamine

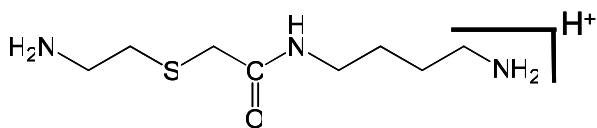

$[\text{M}+\text{H}]^+ = m/z\ 206.1$

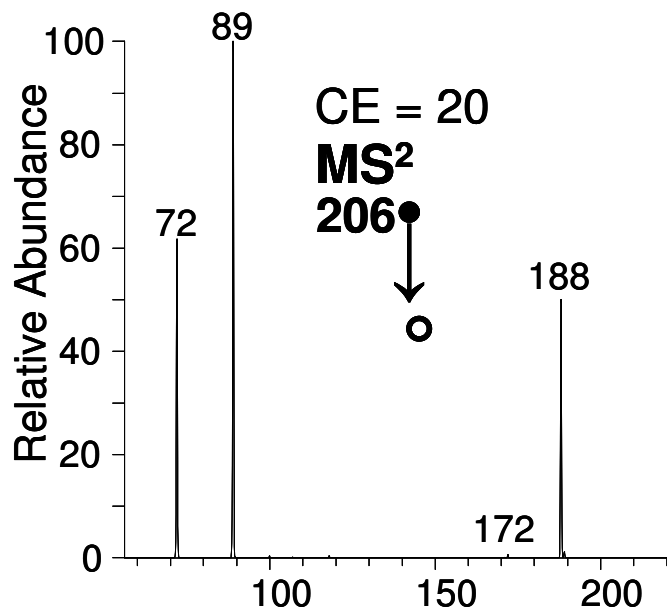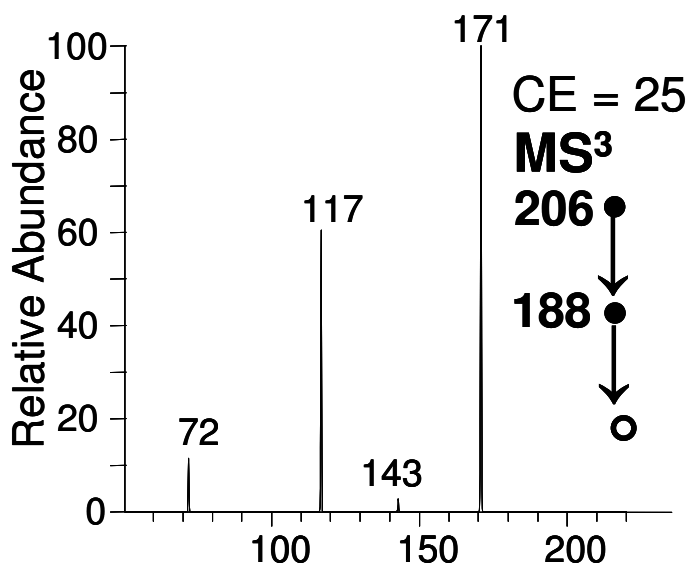

Supporting Information Figure S7. Tandem mass spectra for cysteamine captured by  $\text{VICAT}_{\text{SH}}$ .

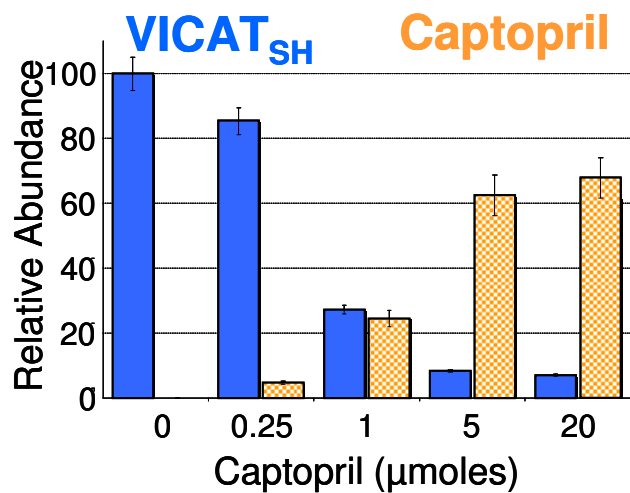

**Supporting Information Figure S8.** Relative abundance of VICAT<sub>SH</sub> and captopril ions observed at various captopril concentrations (μmoles per 1 mL of solution). The relative response of VICAT<sub>SH</sub> decreases as the concentration of captopril in solution increases. The response for captopril plateaus at high solution concentration, thereby indicating saturation of the mesh.
